# Supplementary material for: Identification of Fusion Genes and Targets for Genetically Matched Therapies in a Large Cohort of Salivary Gland Cancer Patients
Source: MDPI journal article supplement (doi:10.3390/cancers14174156), 2022-08-27
Supplement: s1 [file s1]

**Supplementary Table S1: Genes incorporated in the FusionPlex® RadboudV1**

| <b>Gene</b>   | <b>NM Reference</b> | <b>Coverage (exons), 5' or 3' directionality not shown</b> |
|---------------|---------------------|------------------------------------------------------------|
| <b>ABL1</b>   | NM_005157           | exon 1, 2, 3, 4                                            |
| <b>ABL2</b>   | NM_007314           | exon 2, 3, 4, 5, 6                                         |
| <b>ALK</b>    | NM_004304           | exon 2, 4, 6, 10, 16, 17, 18, 19, 20, 21, 22, 23, 26       |
| <b>BCOR</b>   | NM_001123385        | exon 6, 7, 8, 12, 14, 15                                   |
|               | NM_017745           | exon 8                                                     |
| <b>BRAF</b>   | NM_004333           | exon 1, 2, 3, 7, 8, 9, 10, 11, 12, 13, 15, 16              |
| <b>CAMTA1</b> | NM_015215           | exon 3, 8, 9, 10                                           |
| <b>CIC</b>    | NM_015125           | exon 18, 19, 20                                            |
| <b>EGFR</b>   | NM_005228           | exon 1, 7, 8, 9, 16, 19, 20, 24, 25                        |
| <b>ERBB2</b>  | NM_004448           | exon 4, 5, 23, 24, 25, 26                                  |
| <b>ERG</b>    | NM_004449           | exon 2, 3, 4, 5, 6, 7, 8, 9, 10, 11                        |
| <b>ETV6</b>   | NM_001987           | exon 1, 2, 3, 4, 5, 6, 7                                   |
| <b>EWSR1</b>  | NM_005243           | exon 4, 5, 6, 7, 8, 9, 10, 11, 12, 13, 14                  |
| <b>FGFR1</b>  | NM_015850           | exon 2, 3, 4, 5, 6, 7, 8, 9, 10, 11, 12, 17                |
| <b>FGFR2</b>  | NM_000141           | exon 2, 5, 7, 8, 9, 10, 16, 17                             |
| <b>FGFR3</b>  | NM_000142           | exon 3, 5, 8, 9, 10, 16, 17                                |
| <b>FOS</b>    | NM_005252           | exon 1, 2, 3, 4                                            |
| <b>FOSB</b>   | NM_006732           | exon 1, 2, 3                                               |
|               | NM_001114171        | exon 1, 2, 3                                               |
| <b>FOXO1</b>  | NM_002015           | exon 1, 2, 3                                               |
| <b>FUS</b>    | NM_004960           | exon 3, 4, 5, 6, 7, 8, 9, 10, 11, 13, 14                   |
| <b>GLI1</b>   | NM_005269           | exon 4, 5, 6, 7                                            |
| <b>HMGA2</b>  | NM_003483           | exon 1, 2, 3, 4, 5                                         |
| <b>JAZF1</b>  | NM_175061           | exon 2, 3, 4                                               |
| <b>MALT1</b>  | NM_006785           | exon 2, 3, 4, 5, 6, 7, 9, 10                               |
| <b>MAML2</b>  | NM_032427           | exon 2, 3                                                  |
| <b>MET</b>    | NM_000245           | exon 2, 4, 5, 6, 13, 14, 15, 16, 17, 21                    |
| <b>MKL2</b>   | NM_014048           | exon 11, 12, 13                                            |
| <b>MYB</b>    | NM_001130173        | exon 7, 8, 9, 11, 12, 13, 14, 15, 16                       |
| <b>MYBL1</b>  | NM_001080416        | exon 6, 7, 8, 9, 10, 11, 12, 13, 14, 15, 16                |
|               | NM_001144755        | exon 8                                                     |
| <b>NCOA1</b>  | NM_147223           | exon 12, 13, 14, 15                                        |
| <b>NCOA2</b>  | NM_006540           | exon 11, 12, 13, 14, 15, 16                                |
|               | NM_005596           | exon 5, 6, 7, 8, 9                                         |
| <b>NFIB</b>   | NM_001190737        | exon 9, 10                                                 |
|               |                     |                                                            |
| <b>NR4A3</b>  | NM_173200           | exon 3, 4                                                  |
| <b>NR4A3</b>  | NM_006981           | exon 4                                                     |
|               | NM_013962           | exon 1                                                     |
| <b>NRG1</b>   | NM_004495           | exon 1, 2, 3, 6                                            |
|               | NM_013957           | exon 1, 4, 8                                               |
| <b>NTRK1</b>  | NM_002529           | exon 2, 4, 6, 8, 10, 11, 12, 13, 14, 15                    |

|                |              |                                                  |
|----------------|--------------|--------------------------------------------------|
| <b>NTRK2</b>   | NM_006180    | exon 5, 7, 9, 11, 12, 13, 14, 15, 16, 17         |
| <b>NTRK3</b>   | NM_002530    | exon 4, 7, 10, 12, 13, 14, 15, 16                |
|                | NM_001007156 | exon 15                                          |
| <b>PDGFB</b>   | NM_002608    | exon 2, 3                                        |
| <b>PDGFRB</b>  | NM_002609    | exon 8, 9, 10, 11, 12, 13, 14                    |
| <b>PHF1</b>    | NM_024165    | exon 1, 2, 3, 4, 5, 6, 7, 8                      |
| <b>PLAG1</b>   | NM_002655    | exon 1, 2, 3, 4                                  |
| <b>PPARG</b>   | NM_015869    | exon 1, 2, 3                                     |
| <b>PRKD1</b>   | NM_002742    | exon 7, 8, 9, 10, 11, 12, 13, 14, 15, 16, 17     |
| <b>PRKD2</b>   | NM_016457    | exon 7, 8, 9, 10, 11, 12, 13, 14, 15, 16, 17     |
| <b>PRKD3</b>   | NM_005813    | exon 7, 8, 9, 10, 11, 12, 13, 14, 15, 16, 17     |
|                | NM_133509    | exon 11                                          |
| <b>RAD51B</b>  | NM_002877    | exon 11                                          |
|                | NM_133510    | exon 1, 2, 3, 4, 5, 6, 7, 8, 9, 10, 11           |
| <b>RAF1</b>    | NM_002880    | exon 4, 5, 6, 7, 8, 9, 10, 11, 12                |
| <b>RET</b>     | NM_020975    | exon 8, 9, 10, 11, 12, 13, 14                    |
|                | NM_020630    | exon 2, 4, 6                                     |
| <b>ROS1</b>    | NM_002944    | exon 2, 4, 7, 31, 32, 33, 34, 35, 36, 37         |
| <b>SS18</b>    | NM_001007559 | exon 4, 5, 6, 8, 9, 10, 11                       |
| <b>STAT6</b>   | NM_001178078 | exon 1, 2, 3, 4, 5, 6, 7, 15, 16, 17, 18, 19, 20 |
| <b>TFE3</b>    | NM_006521    | exon 2, 3, 4, 5, 6, 7, 8, 10                     |
| <b>THADA</b>   | NM_022065    | exon 24, 25, 26, 27, 28, 29, 30, 36, 37          |
| <b>TMPRSS2</b> | NM_005656    | exon 1, 3, 4, 5, 6                               |
|                | NM_001135099 | exon 1, 2                                        |
| <b>USP6</b>    | NM_004505    | exon 1, 2, 3                                     |
| <b>YWHAE</b>   | NM_006761    | exon 5                                           |

**Supplementary Table S2: Genes incorporated in TruSight Oncology 500 panel**

| TSO500 panel |          |         |         |           |        |         |          |         |         |          |
|--------------|----------|---------|---------|-----------|--------|---------|----------|---------|---------|----------|
| ABL1         | BRD4     | CUX1    | FAM175A | GATA6     | IGF1   | MAP3K13 | NOTCH4   | POLE    | RPTOR   | TAF1     |
| ABL2         | BRIP1    | CXCR4   | FAM46C  | GEN1      | IGF1R  | MAP3K14 | NPM1     | PPARG   | RUNX1   | TBX3     |
| ACVR1        | BTG1     | CYLD    | FANCA   | GID4      | IGF2   | MAP3K4  | NRAS     | PPM1D   | RUNX1T1 | TCEB1    |
| ACVR1B       | BTK      | DAXX    | FANCC   | GLI1      | IKBKE  | MAPK1   | NRG1     | PPP2R1A | RYBP    | TCF3     |
| AKT1         | C11orf30 | DCUN1D1 | FANCD2  | GNA11     | IKZF1  | MAPK3   | NSD1     | PPP2R2A | SDHA    | TCF7L2   |
| AKT2         | CALR     | DDR2    | FANCE   | GNA13     | IL10   | MAX     | NTRK1    | PPP6C   | SDHAF2  | TERC     |
| AKT3         | CARD11   | DDX41   | FANCF   | GNAQ      | IL7R   | MCL1    | NTRK2    | PRDM1   | SDHB    | TERT     |
| ALK          | CASP8    | DHX15   | FANCG   | GNAS      | INHA   | MDC1    | NTRK3    | PREX2   | SDHC    | TET1     |
| ALOX12B      | CBFB     | DICER1  | FANCI   | GPR124    | INHBA  | MDM2    | NUP93    | PRKAR1A | SDHD    | TET2     |
| ANKRD11      | CBL      | DIS3    | FANCL   | GPS2      | INPP4A | MDM4    | NUTM1    | PRKCI   | SETBP1  | TFE3     |
| ANKRD26      | CCND1    | DNAJB1  | FAS     | GREM1     | INPP4B | MED12   | PAK1     | PRKDC   | SETD2   | TFRC     |
| APC          | CCND2    | DNMT1   | FAT1    | GRIN2A    | INSR   | MEF2B   | PAK3     | PRSS8   | SF3B1   | TGFBR1   |
| AR           | CCND3    | DNMT3A  | FBXW7   | GRM3      | IRF2   | MEN1    | PAK7     | PTCH1   | SH2B3   | TGFBR2   |
| ARAF         | CCNE1    | DNMT3B  | FGF1    | GSK3B     | IRF4   | MET     | PALB2    | PTEN    | SH2D1A  | TMEM127  |
| ARFRP1       | CD274    | DOT1L   | FGF10   | H3F3A     | IRS1   | MGA     | PARK2    | PTPN11  | SHQ1    | TMPRSS2  |
| ARID1A       | CD276    | E2F3    | FGF14   | H3F3B     | IRS2   | MITF    | PARP1    | PTPRD   | SLIT2   | TNFAIP3  |
| ARID1B       | CD74     | EED     | FGF19   | H3F3C     | JAK1   | MLH1    | PAX3     | PTPRS   | SLX4    | TNFRSF14 |
| ARID2        | CD79A    | EGFL7   | FGF2    | HGF       | JAK2   | MLL     | PAX5     | PTPRT   | SMAD2   | TOP1     |
| ARID5B       | CD79B    | EGFR    | FGF23   | HIST1H1C  | JAK3   | MLLT3   | PAX7     | QKI     | SMAD3   | TOP2A    |
| ASXL1        | CDC73    | EIF1AX  | FGF3    | HIST1H2BD | JUN    | MPL     | PAX8     | RAB35   | SMAD4   | TP53     |
| ASXL2        | CDH1     | EIF4A2  | FGF4    | HIST1H3A  | KAT6A  | MRE11A  | PBRM1    | RAC1    | SMARCA4 | TP63     |
| ATM          | CDK12    | EIF4E   | FGF5    | HIST1H3B  | KDM5A  | MSH2    | PDCD1    | RAD21   | SMARCB1 | TRAF2    |
| ATR          | CDK4     | EML4    | FGF6    | HIST1H3C  | KDM5C  | MSH3    | PDCD1LG2 | RAD50   | SMARCD1 | TRAF7    |
| ATRX         | CDK6     | EP300   | FGF7    | HIST1H3D  | KDM6A  | MSH6    | PDGFRA   | RAD51   | SMC1A   | TSC1     |
| AURKA        | CDK8     | EPCAM   | FGF8    | HIST1H3E  | KDR    | MST1    | PDGFRB   | RAD51B  | SMC3    | TSC2     |
| AURKB        | CDKN1A   | EPHA3   | FGF9    | HIST1H3F  | KEAP1  | MST1R   | PDK1     | RAD51C  | SMO     | TSHR     |
| AXIN1        | CDKN1B   | EPHA5   | FGFR1   | HIST1H3G  | KEL    | MTOR    | PDPK1    | RAD51D  | SNCAIP  | U2AF1    |
| AXIN2        | CDKN2A   | EPHA7   | FGFR2   | HIST1H3H  | KIF5B  | MUTYH   | PGR      | RAD52   | SOCS1   | VEGFA    |
| AXL          | CDKN2B   | EPHB1   | FGFR3   | HIST1H3I  | KIT    | MYB     | PHF6     | RAD54L  | SOX10   | VHL      |
| B2M          | CDKN2C   | ERBB2   | FGFR4   | HIST1H3J  | KLF4   | MYC     | PHOX2B   | RAF1    | SOX17   | VTCN1    |
| BAP1         | CEBPA    | ERBB3   | FH      | HIST2H3A  | KLHL6  | MYCL1   | PIK3C2B  | RANBP2  | SOX2    | WISP3    |
| BARD1        | CENPA    | ERBB4   | FLCN    | HIST2H3C  | KMT2B  | MYCN    | PIK3C2G  | RARA    | SOX9    | WT1      |
| BBC3         | CHD2     | ERCC1   | FLI1    | HIST2H3D  | KMT2C  | MYD88   | PIK3C3   | RASA1   | SPEN    | XIAP     |
| BCL10        | CHD4     | ERCC2   | FLT1    | HIST3H3   | KMT2D  | MYOD1   | PIK3CA   | RB1     | SPOP    | XPO1     |
| BCL2         | CHEK1    | ERCC3   | FLT3    | HLA-A     | KRAS   | NAB2    | PIK3CB   | RBM10   | SPTA1   | XRCC2    |
| BCL2L1       | CHEK2    | ERCC4   | FLT4    | HLA-B     | LAMP1  | NBN     | PIK3CD   | RECQL4  | SRC     | YAP1     |
| BCL2L11      | CIC      | ERCC5   | FOXA1   | HLA-C     | LATS1  | NCOA3   | PIK3CG   | REL     | SRSF2   | YES1     |
| BCL2L2       | CREBBP   | ERG     | FOXL2   | HNF1A     | LATS2  | NCOR1   | PIK3R1   | RET     | STAG1   | ZBTB2    |
| BCL6         | CRKL     | ERRFI1  | FOXO1   | HNRNPK    | LMO1   | NEGR1   | PIK3R2   | RFWD2   | STAG2   | ZBTB7A   |
| BCOR         | CRLF2    | ESR1    | FOXP1   | HOXB13    | LRP1B  | NF1     | PIK3R3   | RHEB    | STAT3   | ZFHX3    |
| BCORL1       | CSF1R    | ETS1    | FRS2    | HRAS      | LYN    | NF2     | PIM1     | RHOA    | STAT4   | ZNF217   |
| BCR          | CSF3R    | ETV1    | FUBP1   | HSD3B1    | LZTR1  | NFE2L2  | PLCG2    | RICTOR  | STAT5A  | ZNF703   |
| BIRC3        | CSNK1A1  | ETV4    | FYN     | HSP90AA1  | MAGI2  | NFKBIA  | PLK2     | RIT1    | STAT5B  | ZRSR2    |

|               |               |                |               |               |               |               |               |                |              |
|---------------|---------------|----------------|---------------|---------------|---------------|---------------|---------------|----------------|--------------|
| <i>BLM</i>    | <i>CTCF</i>   | <i>ETV5</i>    | <i>GABRA6</i> | <i>ICOSLG</i> | <i>MALT1</i>  | <i>NKX2-1</i> | <i>PMAIP1</i> | <i>RNF43</i>   | <i>STK11</i> |
| <i>BMPR1A</i> | <i>CTLA4</i>  | <i>ETV6</i>    | <i>GATA1</i>  | <i>ID3</i>    | <i>MAP2K1</i> | <i>NKX3-1</i> | <i>PMS1</i>   | <i>ROS1</i>    | <i>STK40</i> |
| <i>BRAF</i>   | <i>CTNNA1</i> | <i>EWSR1</i>   | <i>GATA2</i>  | <i>IDH1</i>   | <i>MAP2K2</i> | <i>NOTCH1</i> | <i>PMS2</i>   | <i>RPS6KA4</i> | <i>SUFU</i>  |
| <i>BRCA1</i>  | <i>CTNNB1</i> | <i>EZH2</i>    | <i>GATA3</i>  | <i>IDH2</i>   | <i>MAP2K4</i> | <i>NOTCH2</i> | <i>PNRC1</i>  | <i>RPS6KB1</i> | <i>SUZ12</i> |
| <i>BRCA2</i>  | <i>CUL3</i>   | <i>FAM123B</i> | <i>GATA4</i>  | <i>IFNGR1</i> | <i>MAP3K1</i> | <i>NOTCH3</i> | <i>POLD1</i>  | <i>RPS6KB2</i> | <i>SYK</i>   |

**Supplementary Table S3: virtual TSO500 panel that mainly contains genes in which aberrations may lead to targeted treatment**

| Analyzed genes | TS/O/R <sup>1</sup> | Counted as targetable <sup>2</sup> |
|----------------|---------------------|------------------------------------|
| <i>AR</i>      | O,R                 | No                                 |
| <i>AKT1</i>    | O                   | Mut/Amp                            |
| <i>AKT2</i>    | O                   | Mut/Amp                            |
| <i>AKT3</i>    | O                   | Mut/Amp                            |
| <i>ALK</i>     | O,R                 | Fus <sup>3</sup>                   |
| <i>ATM</i>     | TS                  | Bi-allelic inactivation            |
| <i>BARD1</i>   | TS                  | Bi-allelic inactivation            |
| <i>BRAF</i>    | O                   | Mut/Fus <sup>3</sup>               |
| <i>BRCA1</i>   | TS                  | Bi-allelic inactivation            |
| <i>BRCA2</i>   | TS                  | Bi-allelic inactivation            |
| <i>BRIP1</i>   | TS                  | Bi-allelic inactivation            |
| <i>B2M</i>     | R                   | No                                 |
| <i>CCND1</i>   | O                   | Amp                                |
| <i>CDK12</i>   | TS,O                | Bi-allelic inactivation            |
| <i>CDK4</i>    | O                   | Mut/Amp                            |
| <i>CDK6</i>    | O                   | Amp                                |
| <i>CDKN2A</i>  | TS                  | Bi-allelic inactivation            |
| <i>EGFR</i>    | O,R                 | Mut/Fus <sup>3</sup>               |
| <i>ERBB2</i>   | O                   | Mut/Amp                            |
| <i>ERBB4</i>   | O                   | Mut                                |
| <i>FANCL</i>   | TS                  | Bi-allelic inactivation            |
| <i>FGFR1</i>   | O                   | Mut/Amp/Fus <sup>3</sup>           |
| <i>FGFR2</i>   | O                   | Mut/Amp/Fus <sup>3</sup>           |
| <i>FGFR3</i>   | O                   | Mut/Amp/Fus <sup>3</sup>           |
| <i>FGFR4</i>   | O                   | Mut/Amp                            |
| <i>HRAS</i>    | O                   | Mut                                |
| <i>JAK1</i>    | R                   | No                                 |
| <i>JAK2</i>    | O,R                 | No                                 |
| <i>KIT</i>     | O,R                 | Mut/Amp                            |
| <i>KRAS</i>    | O                   | Mut (only G12C)                    |
| <i>MAP2K1</i>  | O                   | Mut                                |
| <i>MAP2K2</i>  | O                   | Mut                                |
| <i>MAP2K4</i>  | TS                  | Bi-allelic inactivation            |
| <i>MAP3K1</i>  | TS                  | Bi-allelic inactivation            |
| <i>MET</i>     | O                   | Mut/Amp/Fus <sup>3</sup>           |
| <i>MLH1</i>    | TS                  | Bi-allelic inactivation            |
| <i>MSH2</i>    | TS                  | Bi-allelic inactivation            |
| <i>MSH6</i>    | TS                  | Bi-allelic inactivation            |
| <i>NOTCH1</i>  | TS, O               | Activating Mut                     |
| <i>NOTCH2</i>  | O                   | Activating Mut                     |
| <i>NOTCH3</i>  | O                   | Activating Mut                     |

|                |       |                                                                             |
|----------------|-------|-----------------------------------------------------------------------------|
| <i>NOTCH4</i>  | TS, O | No                                                                          |
| <i>NRAS</i>    | O     | Mut                                                                         |
| <i>PALB2</i>   | TS    | Bi-allelic inactivation                                                     |
| <i>PDGFRA</i>  | O     | Mut/Amp                                                                     |
| <i>PDGFRB</i>  | O     | Mut/Amp                                                                     |
| <i>PIK3CA</i>  | O     | Mut                                                                         |
| <i>PIK3R1</i>  | TS    | Bi-allelic inactivation/activating mutations                                |
| <i>PIK3R2</i>  | TS    | Bi-allelic inactivation                                                     |
| <i>POLE</i>    | TS    | No                                                                          |
| <i>PPP2R2A</i> | TS    | Bi-allelic inactivation                                                     |
| <i>PTEN</i>    | TS    | Bi-allelic inactivation                                                     |
| <i>RAD51B</i>  | TS    | Bi-allelic inactivation                                                     |
| <i>RAD51C</i>  | TS    | Bi-allelic inactivation                                                     |
| <i>RAD51D</i>  | TS    | Bi-allelic inactivation                                                     |
| <i>RAD54L</i>  | TS    | Bi-allelic inactivation                                                     |
| <i>RAF1</i>    | O     | No                                                                          |
| <i>RET</i>     | O     | Mut/Fus <sup>3</sup>                                                        |
| <i>TP53</i>    | TS    | No                                                                          |
| <i>TSC1</i>    | TS    | Bi-allelic inactivation                                                     |
| <i>TSC2</i>    | TS    | Bi-allelic inactivation                                                     |
| MSI            | -     | ≥25% unstable sites; in case of 10-25% unstable sites, confirm with MMR IHC |
| TMB            | -     | ≥15mut/Mb                                                                   |

1. TS: Tumor suppressor; O: Oncogene; R: Resistance gene  
2. Only (likely) pathogenic mutations were counted as targetable, scored following recommendations of the American College of Medical Genetics and Genomics and the Association for Molecular Pathology. Bi-allelic inactivation: mut and/or loss.  
Abbreviations: Mut: mutation; Amp: amplification; Fus: fusion; MSI: microsatellite instability; MMR: mismatch repair; IHC: immunohistochemistry; TMB: tumor mutational burden.  
3. Fusions are not detectable by the TSO500 panel, but fusions in these genes were detectable by the FusionPlex® RadboudV1 panel that was used too in this study. In this panel fusions in these genes were counted as actionable: *ABL1*, *ALK*, *BRAF*, *EGFR*, *FGFR1-3*, *MAML2*, *MET*, *NRG1*, *NTRK1-3*, *RET* and *ROS1*.
